# Supplementary material for: Colorimetric ELISA with an acid–base indicator for sensitive detection of ochratoxin A in corn samples
Source: Royal Society of Chemistry journal article supplement (doi:10.1039/c7ay01959a), 2017-11-16
Supplement: c7ay01959a1.pdf [file c7ay01959a1.pdf]

## **Colorimetric ELISA with acid – base indicator for sensitive detection of ochratoxin A in corn samples**

Ke Pei<sup>a,b</sup>, Ying Xiong<sup>a,b</sup>, Xiangmin Li<sup>\*b</sup>, Hu Jiang<sup>b</sup>, and Yonghua Xiong<sup>\*a,b</sup>

<sup>a</sup> *State Key Laboratory of Food Science and Technology, Nanchang University,  
Nanchang 330047, P. R. China;*

<sup>b</sup> *Jiangxi-OAI Joint Research Institute, Nanchang University, Nanchang 330047, P. R.  
China;*

*\*Correspondence to:*

*Dr. Xiangmin Li*

*Jiangxi-OAI Joint Research Institute, Nanchang University*

*Address: 235 Nanjing East Road, Nanchang 330047, P.R. China*

*Phone: +0086-791-8833-3529.*

*E-mail: [lixiangmin73@163.com](mailto:lixiangmin73@163.com).*

*Dr. Yonghua Xiong*

*State Key Laboratory of Food Science and Technology, and Jiangxi-OAI Joint  
Research Institute, Nanchang University*

*Address: 235 Nanjing East Road, Nanchang 330047, P.R. China*

*Phone: +0086-791-8833-4578. Fax: +0086-791-8833-3708.*

*E-mail: [yhxiongchen@163.com](mailto:yhxiongchen@163.com).*

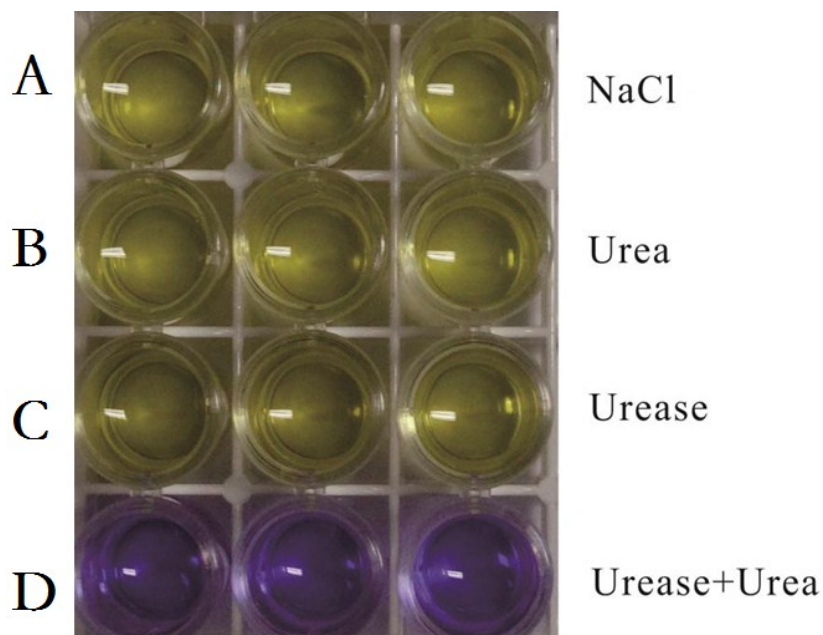

**Figure S1.** The effects of urea and urease@OTA on BCP colored change. A: 10  $\mu$ L of BCP dye (8 mg/mL) dissolved in 0.128 mol/L NaCl solution (pH 5.96); B: 10  $\mu$ L of BCP dye (8 mg/mL) dissolved in 0.128 mol/L NaCl solution (pH 5.96) containing 0.1 mol/L urea; C: 10  $\mu$ L of BCP dye (8 mg/mL) dissolved in 0.128 mol/L NaCl solution (pH 5.96) containing 100  $\mu$ g/mL urease@OTA;. D: 10  $\mu$ L of BCP dye (8 mg/mL) dissolved in 0.128 mol/L NaCl solution (pH 5.96) containing 0.1 mol/L urea and 100 nmol/L urease@OTA .

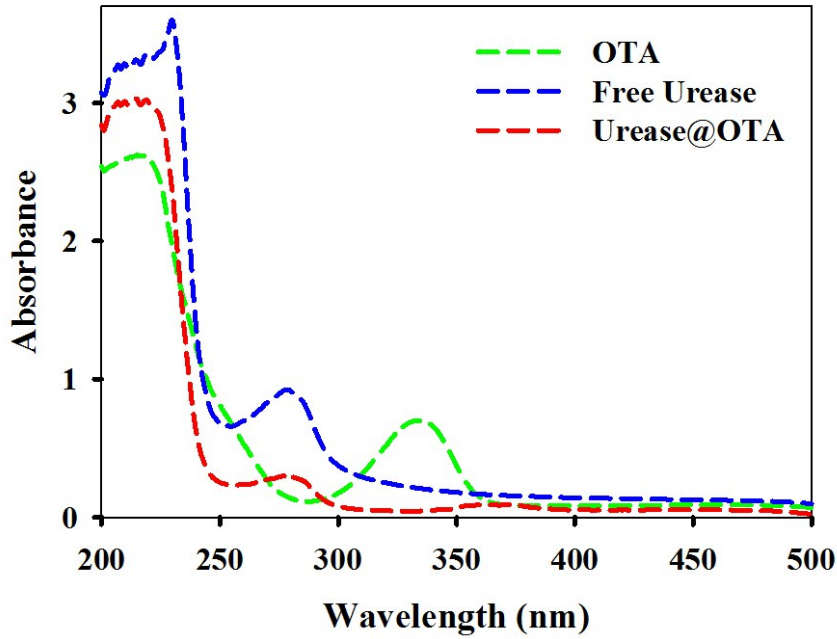

**Figure S2.** UV-vis absorption spectra of OTA (green line), urease (blue line), and urease@OTA conjugates (red line). Compared with that of urease, the UV-vis spectrum of Urease@OTA conjugates displayed two characteristic peaks at 280 and 363 nm, respectively. The concentrations of OTA, urease, and urease@OTA were 10, 760, and 300  $\mu\text{g/mL}$ , respectively. According to derivation of LambertBeer law, the following formula can be used to calculate the conjugation ratio:

$$C_a/C_b = (AC_{am} \cdot KB_{bm} - AC_{bm} \cdot KB_{am}) / (AC_{bm} \cdot KA_{am} - AC_{am} \cdot KA_{bm}),$$

Where  $(C_a/C_b)$  is the optical density of the conjugate at the maximum absorption wavelengths of A and B.  $KA_{am}$  and  $KB_{bm}$  are the molar extinction coefficients of A and B at their maximum absorption wavelength.  $KA_{bm}$  represents the molar extinction coefficient of A at the maximum absorption wavelength of B.  $KB_{am}$  stands for the molar extinction coefficient of B at the maximum absorption wavelength of A. The molar extinction coefficient is calculated by the following formula: where  $KY_{xm} =$

$AY_{xm}/(\rho_x/M_x)$ , Y stands for A or B; x stands for a (OTA) or b (urease);  $\rho_x$  is the concentration of x;  $M_x$  is the molar mass of x; and  $AY_{xm}$  is the optical density of Y at the maximum absorption wavelength of x. The primary data are displayed below, and the optical densities can be obtained from the UV-vis spectrum.

$\rho_a = 10 \text{ } \mu\text{g/mL}$ ,  $\rho_b = 760 \text{ } \mu\text{g/mL}$ ,  $M_a = 403.8$ ,  $M_b = 480000$ ,  $AA_{am} = 0.6999$ ,  $AA_{bm} = 0.1516$ ,  $AB_{am} = 0.2093$ ,  $AB_{bm} = 0.9239$ ,  $AC_{am} = 0.0453$ , and  $AC_{bm} = 0.3016$ . Thus, the  $C_a/C_b$  value is 5.73.

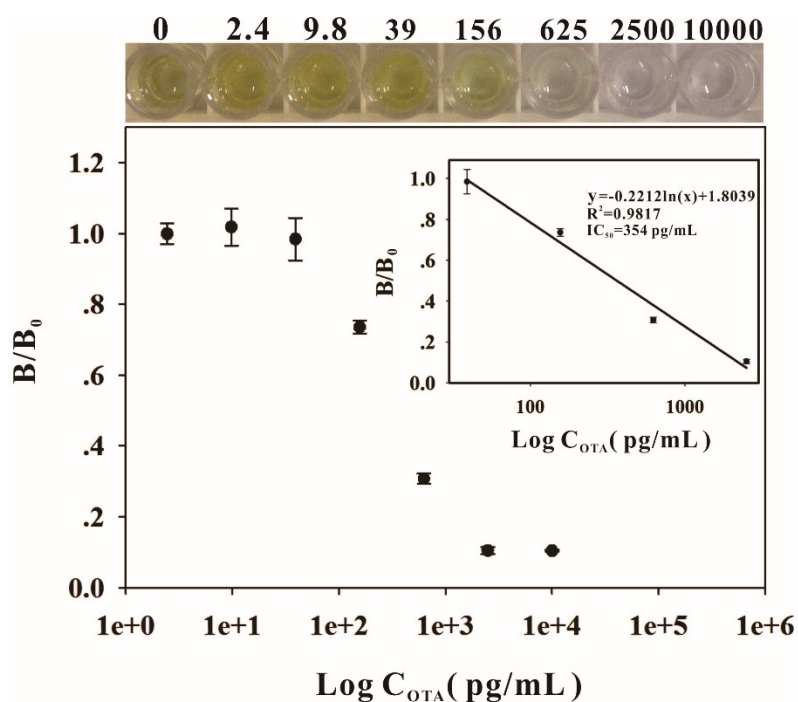

**Figure S3.** Quantitative immunoassay of OTA using HRP-based conventional ELISA in 0.02 M PB buffer with pH 6.5 and contains 5% methanol. The inset shows the calibration curve with OTA concentration ranging from 39 pg/mL to 2500 pg/mL ( $R^2 = 0.9817$ ). At the top, the color of TMB acts as the qualitative analysis by naked eye. The cutoff limit of the HRP-based conventional ELISA is about 625 pg/mL. The error bars represent the standard deviation of three measurements.

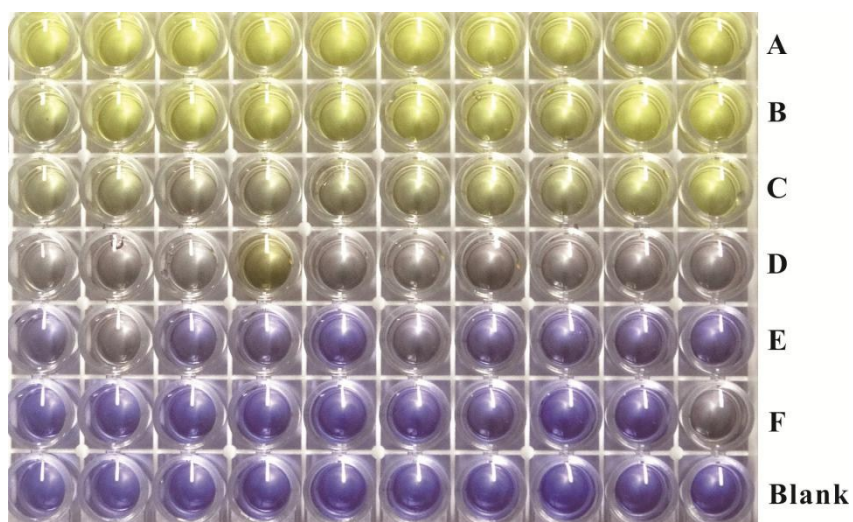

**Figure S4.** Reliability of the proposed method for the OTA qualitative detection with naked eye was evaluated by analyzing OTA spiked samples in corn extract. A: OTA (160 pg/mL), B: OTA (100 pg/mL), C: OTA (60 pg/mL), D: OTA (50 pg/mL), E: DON (20 ng/mL), F: OTA (10 pg/mL), and blank (0 pg/mL). Blank test was performed by adding 0.128 mol/L NaCl solution (pH 5.96) containing 10% methanol. All samples were analyzed by the proposed method for 10 times.

**Table S1.** Concentrations of anti-OTA mAb and urease@OTA were optimized using the checkerboard titration method.

| Dilution of urease@OTA | Dilution of anti-OTA mAb |        |        |         |
|------------------------|--------------------------|--------|--------|---------|
|                        | 2000                     | 4000   | 8000   | 16000   |
| <b>10</b>              | 7.7447                   | 7.4097 | 7.1351 | 6.7550  |
| <b>20</b>              | 6.2164                   | 5.6613 | 5.4074 | 4.9652  |
| <b>40</b>              | 6.0173                   | 5.3246 | 4.1733 | 3.8903  |
| <b>80</b>              | 5.2251                   | 3.1667 | 2.5652 | 2.0118  |
| <b>160</b>             | 2.8657                   | 2.4234 | 1.7457 | 1.4016* |
| <b>320</b>             | 2.2161                   | 1.6704 | 1.4645 | 0.9708  |
| <b>640</b>             | 0.9358                   | 0.8219 | 0.5060 | 0.2782  |

Notes: The initial concentrations of mouse anti-OTA mAbs and urease@OTA were 0.31 mg/mL and 1.0 mg/mL, respectively. The OD<sub>588/434</sub> value is represents the signal output. The red mark denotes optimal conditions.
